# Supplementary material for: Activity of pemetrexed in pre-clinical chordoma models and humans
Source: PubMed Central journal article supplement (PMC10163028; doi:10.1038/s41598-023-34404-4), 2023-05-05
Supplement: 41598_2023_34404_MOESM1_ESM.pdf [file 41598_2023_34404_MOESM1_ESM.pdf]

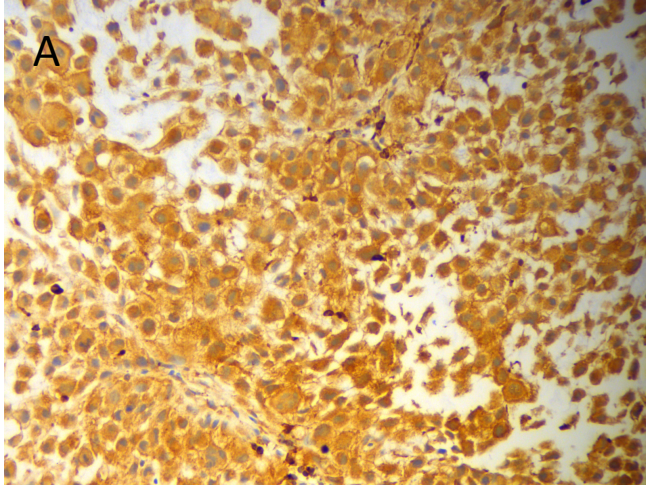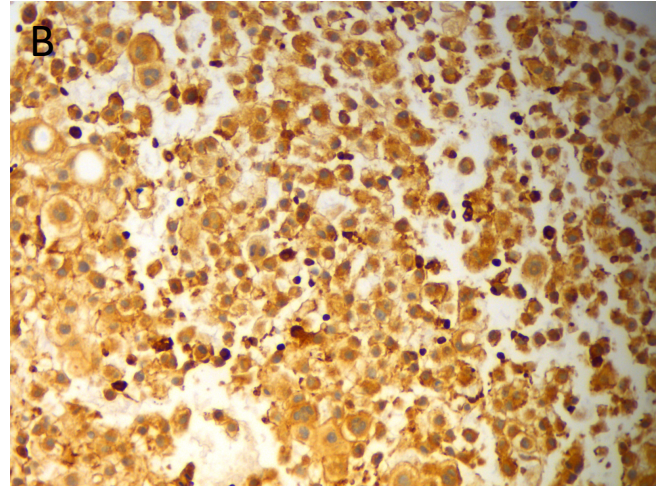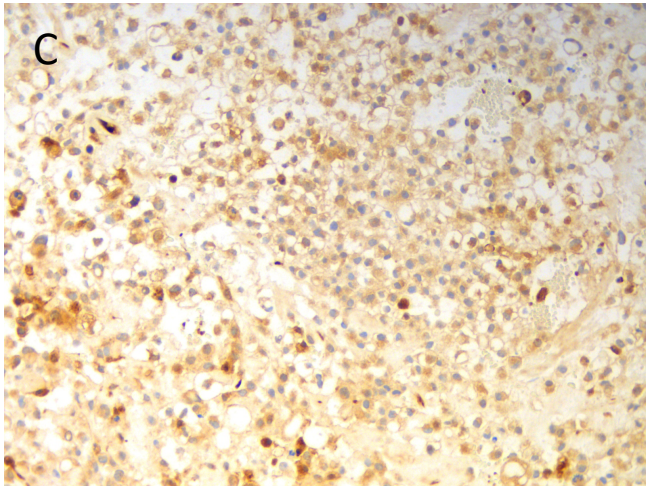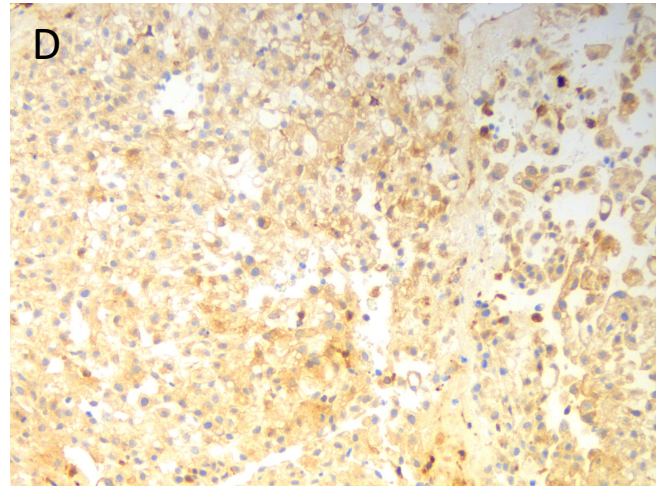

**Fig. S1. Immunohistochemical staining of U-CH1 p16 and SF10792 MTAP**

**(A,B).** U-CH1 cell line shows strong and diffuse nuclear and cytoplasmic p16 immunoreactivity

(score, 2) **(C,D).** SF10792 cell line shows weak methylthioadenosine phosphorylase (MTAP) staining

(score 0,1)
